# Supplementary material for: Alternation emerges as a multi-modal strategy for turbulent odor navigation
Source: eLife journal article supplement (doi:10.7554/elife.76989), 2022-08-12
Supplement: supp [file elife-76989-supp-v1.zip]

Archive with 7 entries (7 files):
- elife_poa_e76989_Transparent_Reporting_File.docx
- elife_poa_e76989_Figure_2_figure_supplement_1.pdf
- elife_poa_e76989_Figure_3_figure_supplement_1.pdf
- elife_poa_e76989_Figure_4_figure_supplement_1.pdf
- elife_poa_e76989_Figure_4_figure_supplement_2.pdf
- elife_poa_e76989_Figure_3_video_1.mp4
- elife_poa_e76989_Source_data_1.zip
