# Supplementary figures and images for: Alternation emerges as a multi-modal strategy for turbulent odor navigation
Source: eLife journal article supplement (doi:10.7554/elife.76989), 2022-08-12

Nose

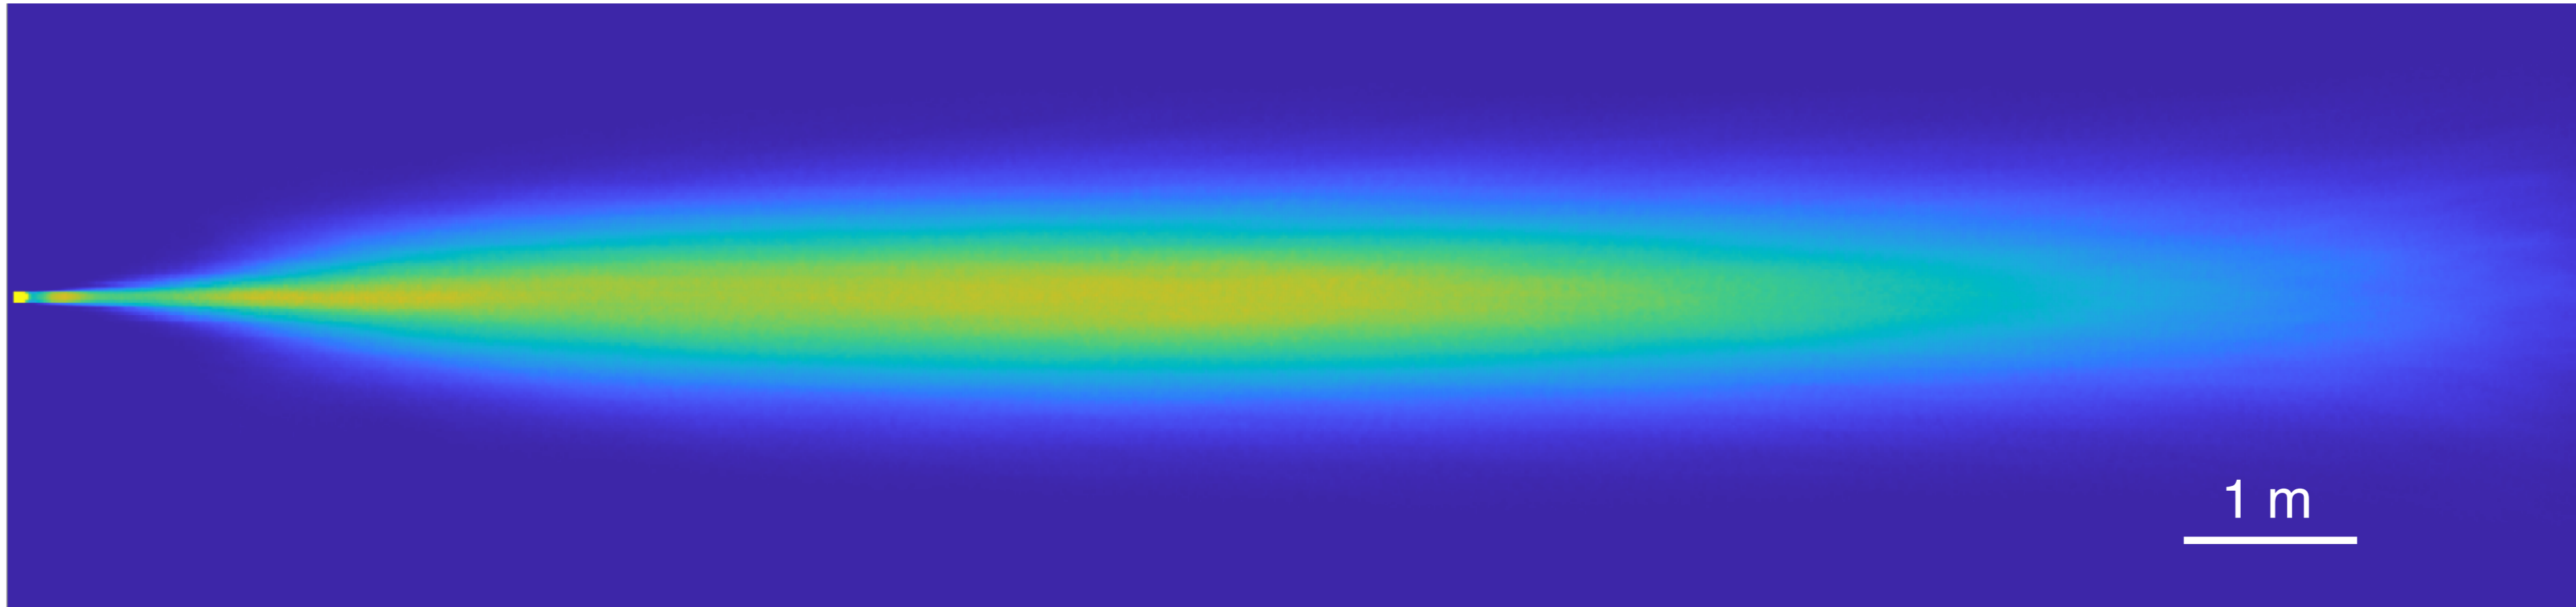

Ground

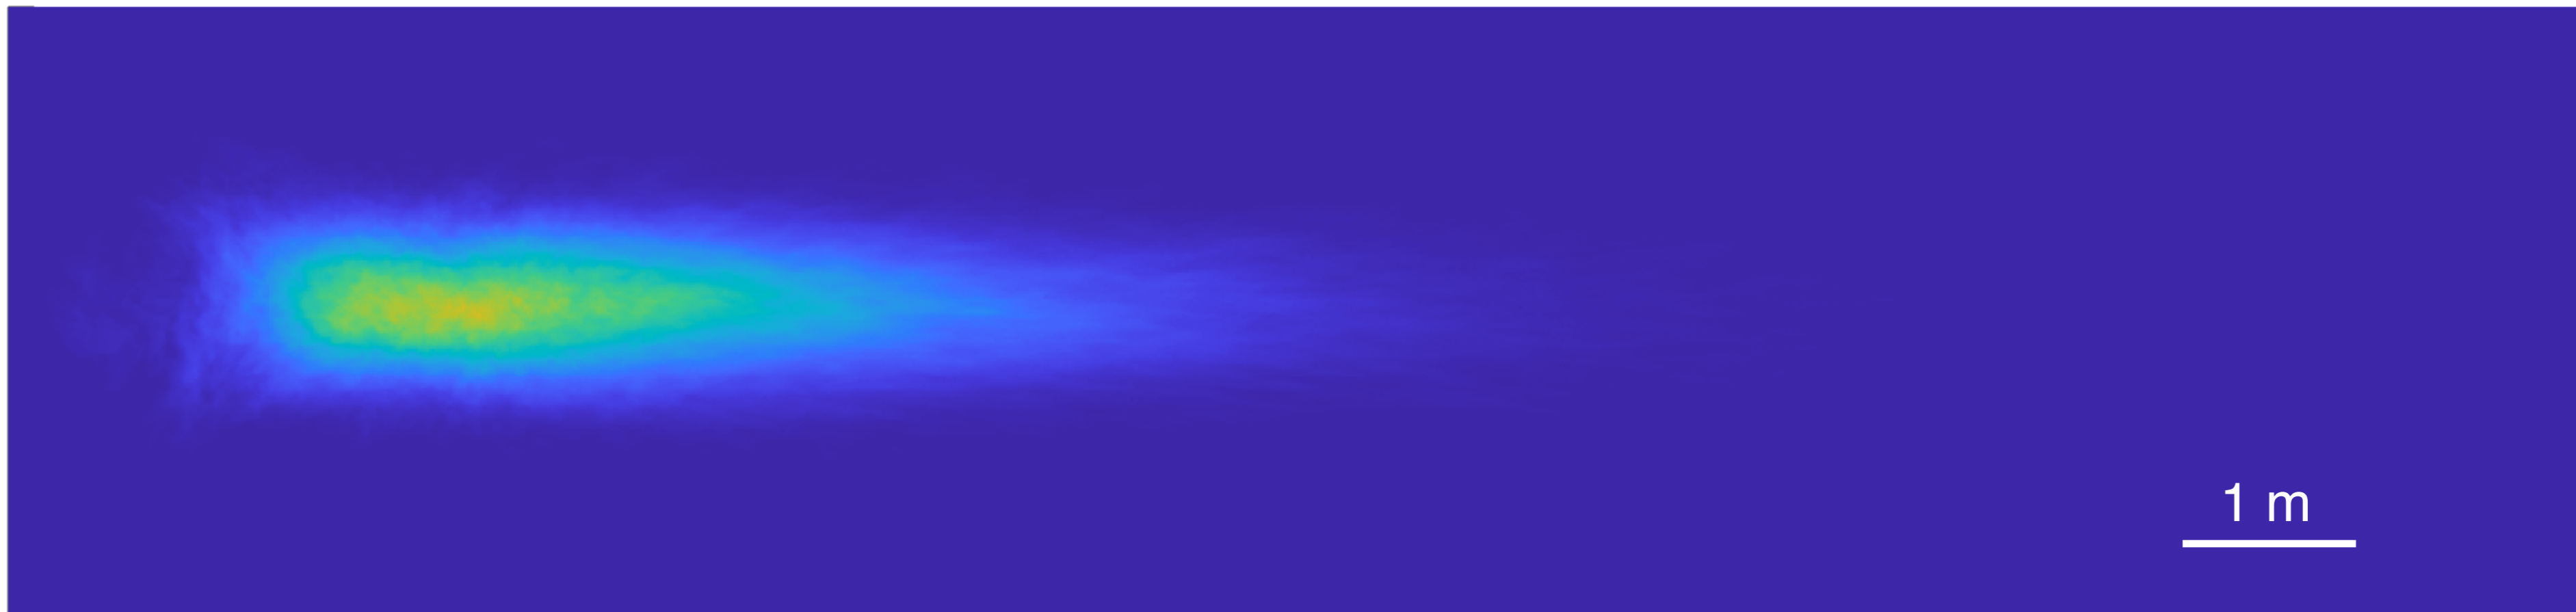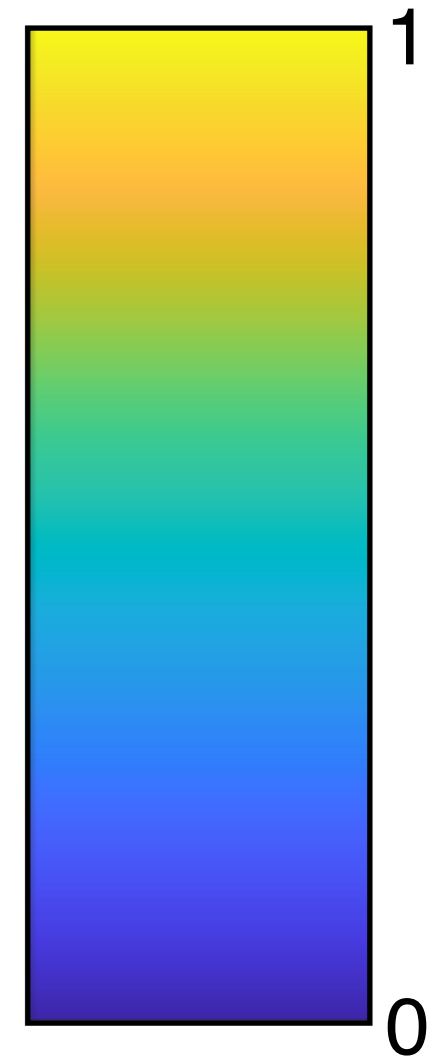

Supplement: supp [file elife-76989-supp-v1.zip › elife_poa_e76989_Figure_2_figure_supplement_1.pdf]

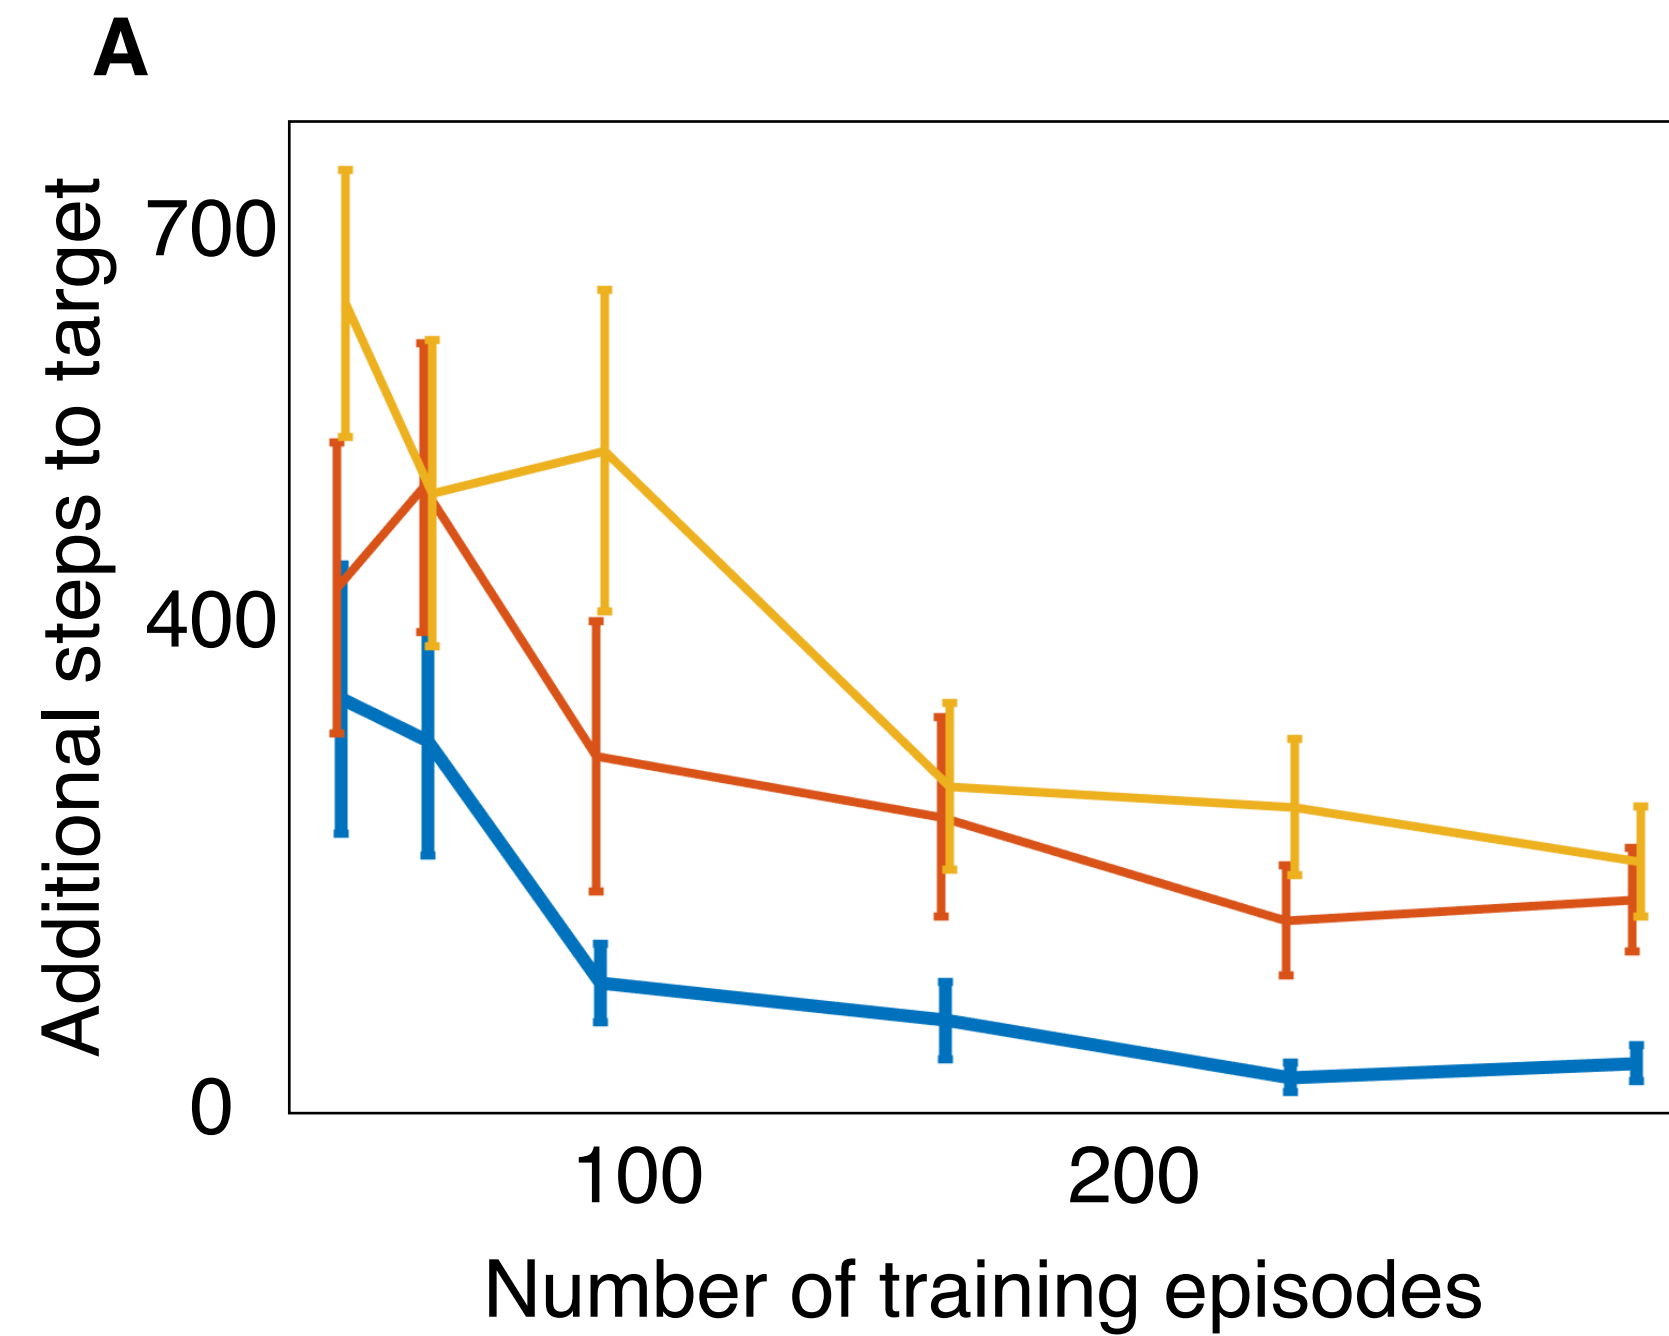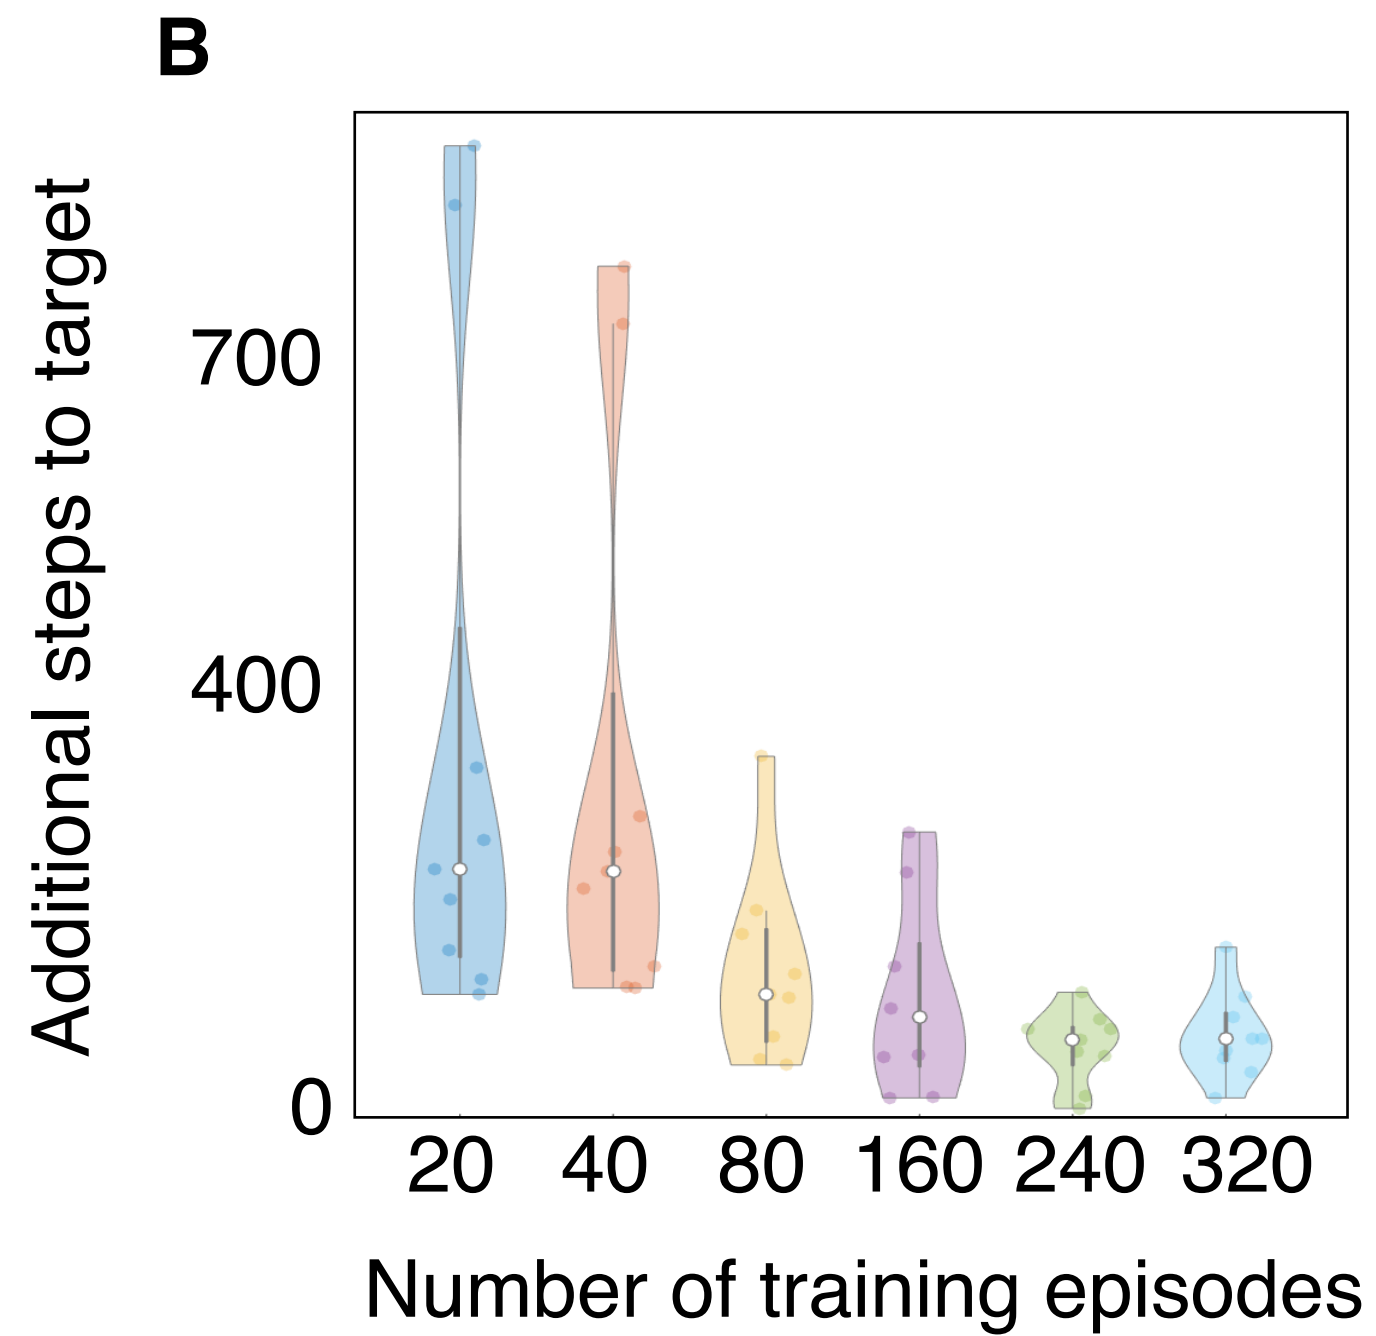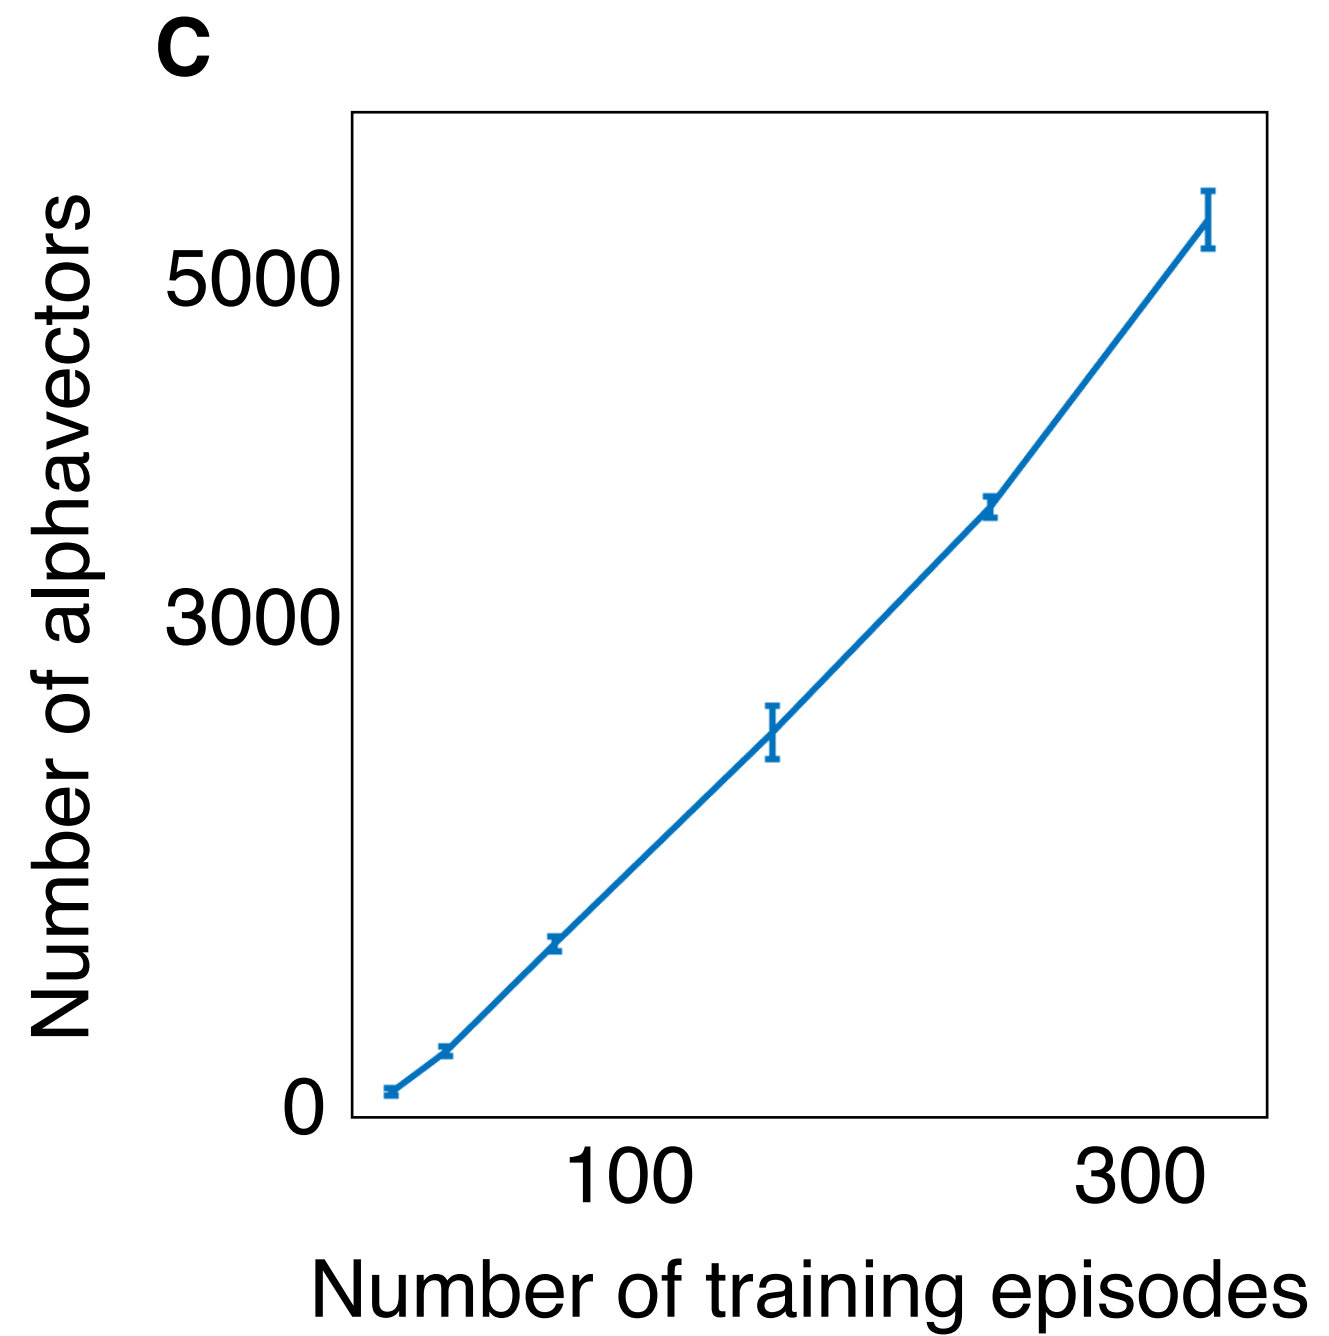

Supplement: supp [file elife-76989-supp-v1.zip › elife_poa_e76989_Figure_3_figure_supplement_1.pdf]

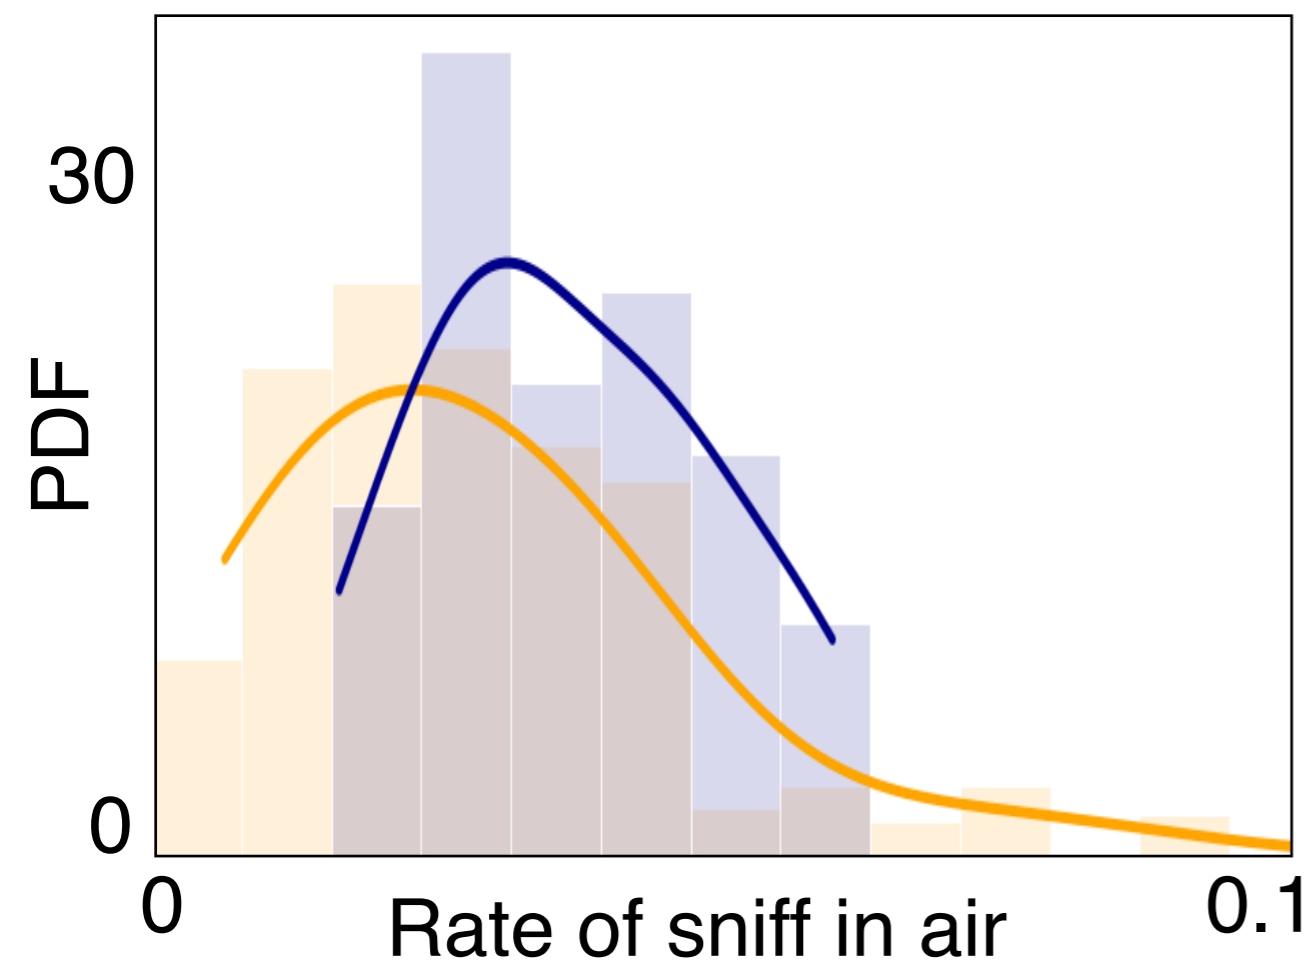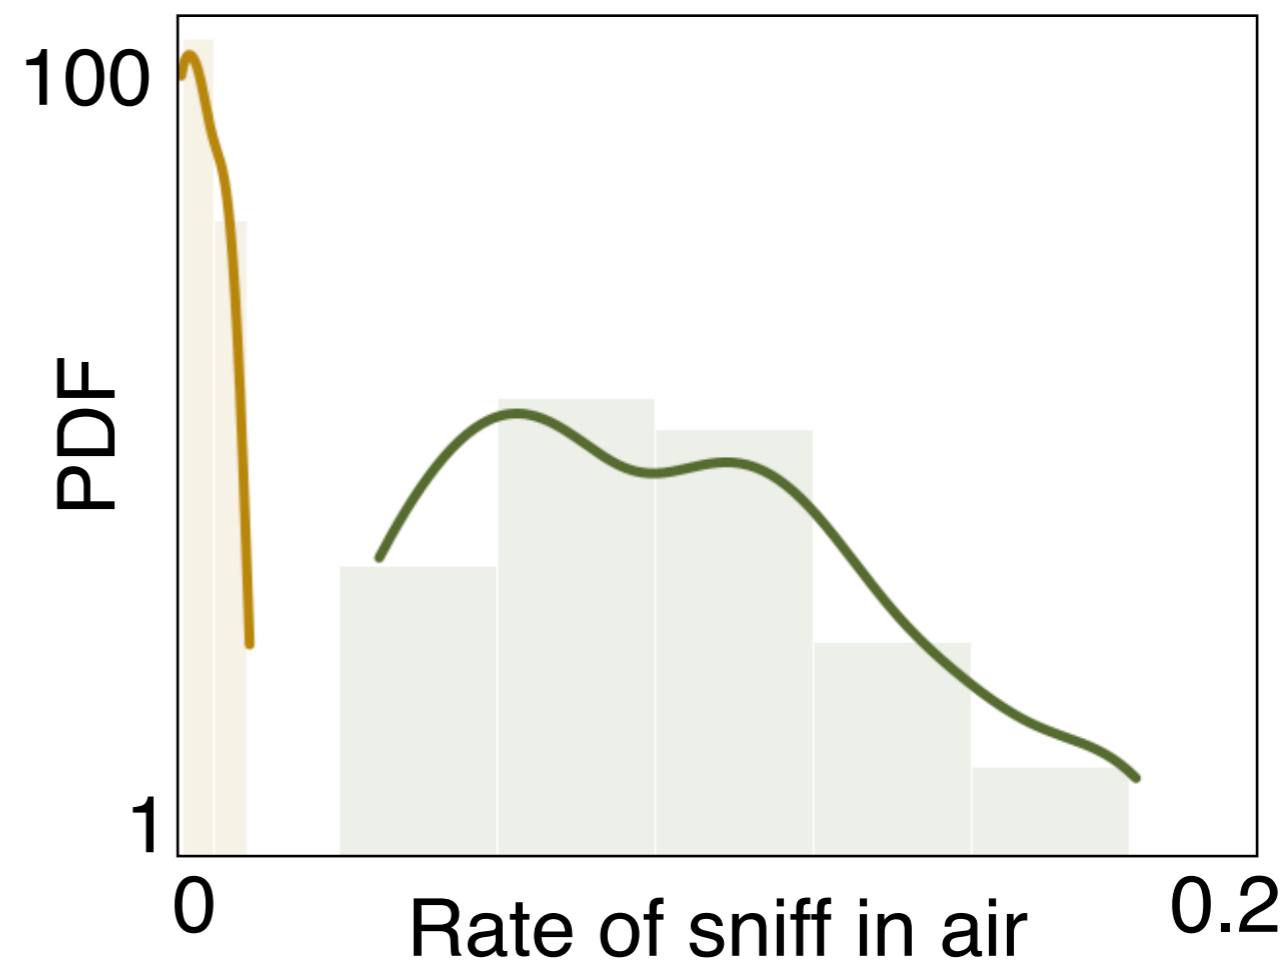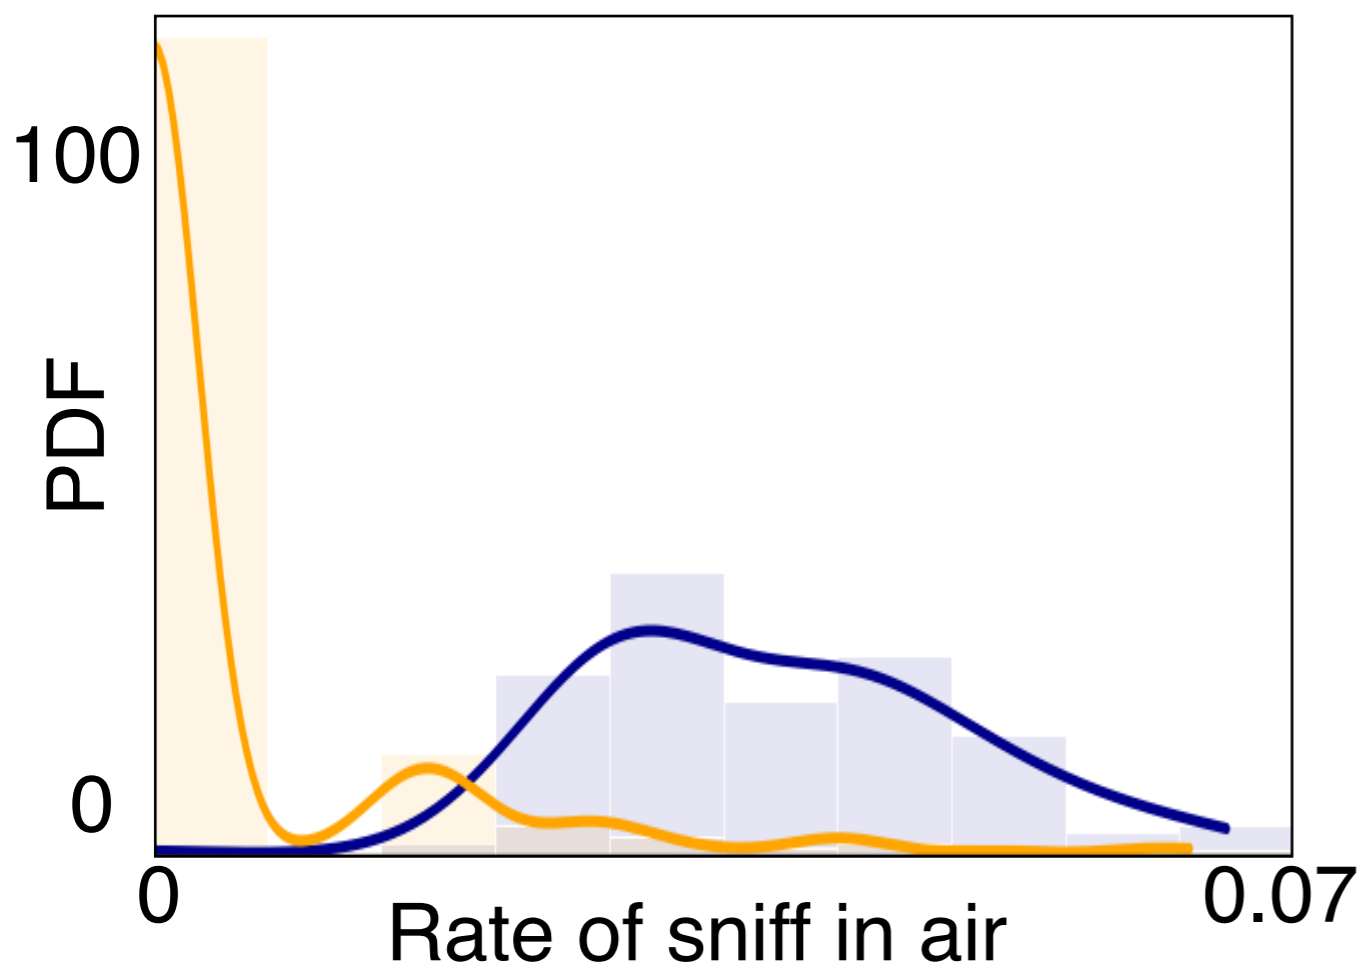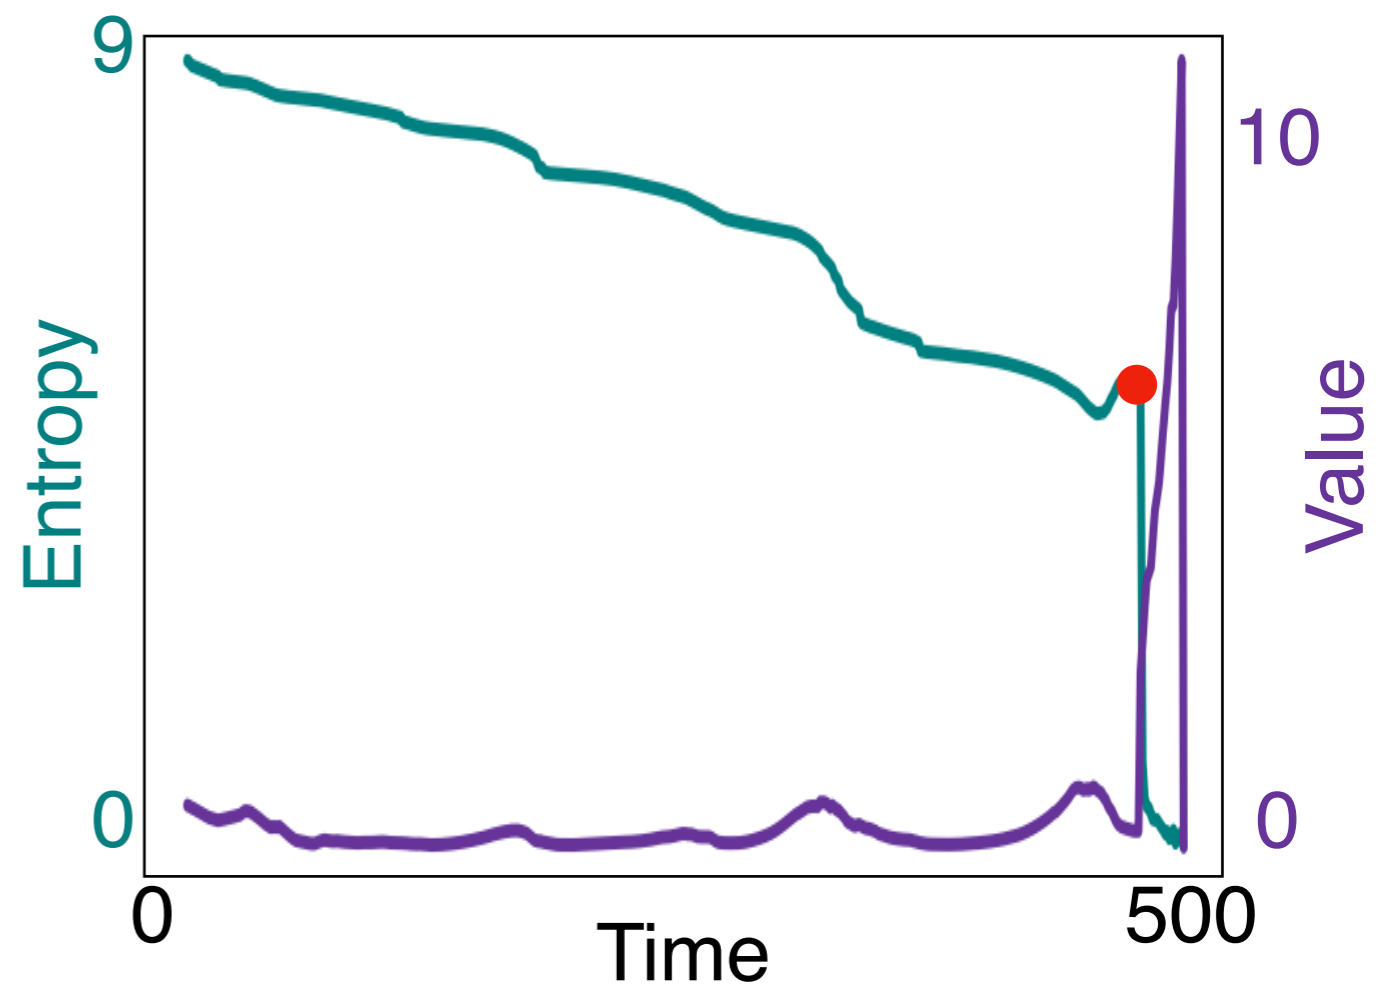

Supplement: supp [file elife-76989-supp-v1.zip › elife_poa_e76989_Figure_4_figure_supplement_1.pdf]

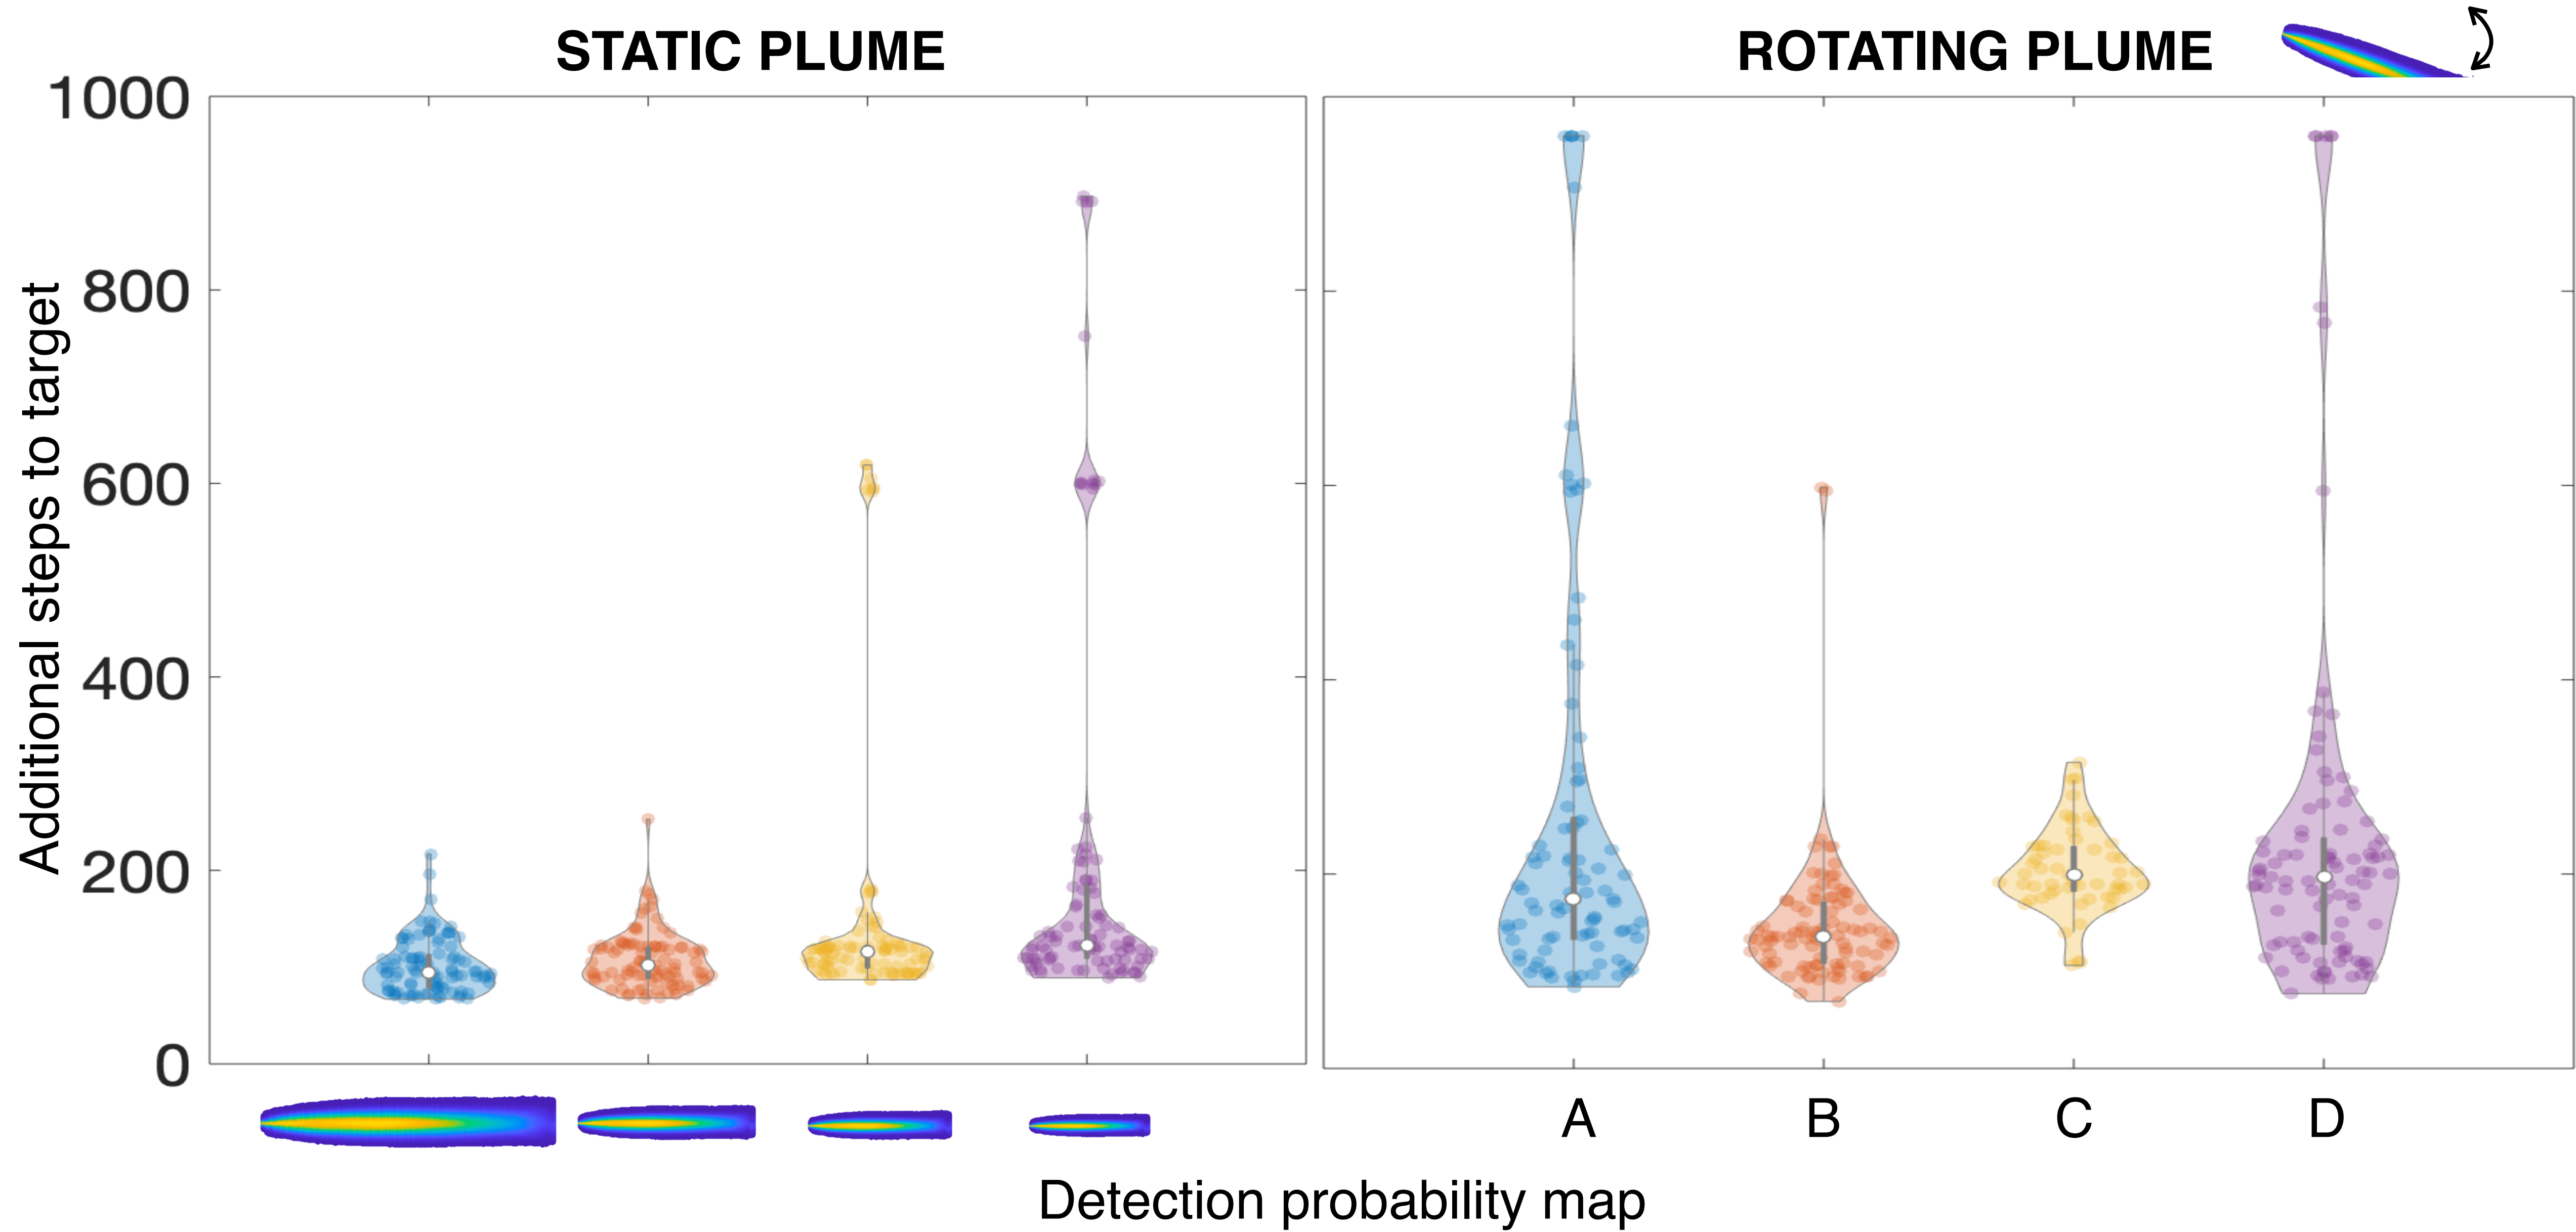

Supplement: supp [file elife-76989-supp-v1.zip › elife_poa_e76989_Figure_4_figure_supplement_2.pdf]
